# Supplementary material for: Pyrrolizidine-Derived Alkaloids: Highly Toxic Components in the Seeds of Crotalaria cleomifolia Used in Popular Beverages in Madagascar
Source: MDPI journal article supplement (doi:10.3390/molecules26113464), 2021-06-07

## Supplementary Material

### Pyrrolizidine-derived Alkaloids: Highly Toxic Components in the Seeds of *Crotalaria cleomifolia* Used in Popular Beverages in Madagascar

IR, MS and NMR data ( $^1\text{H}$  NMR,  $^{13}\text{C}$  NMR, COSY, HMBC and HMQC) of compound **1**.

MS and  $^1\text{H}$  NMR of compound **2**.

IR of compound **1**.

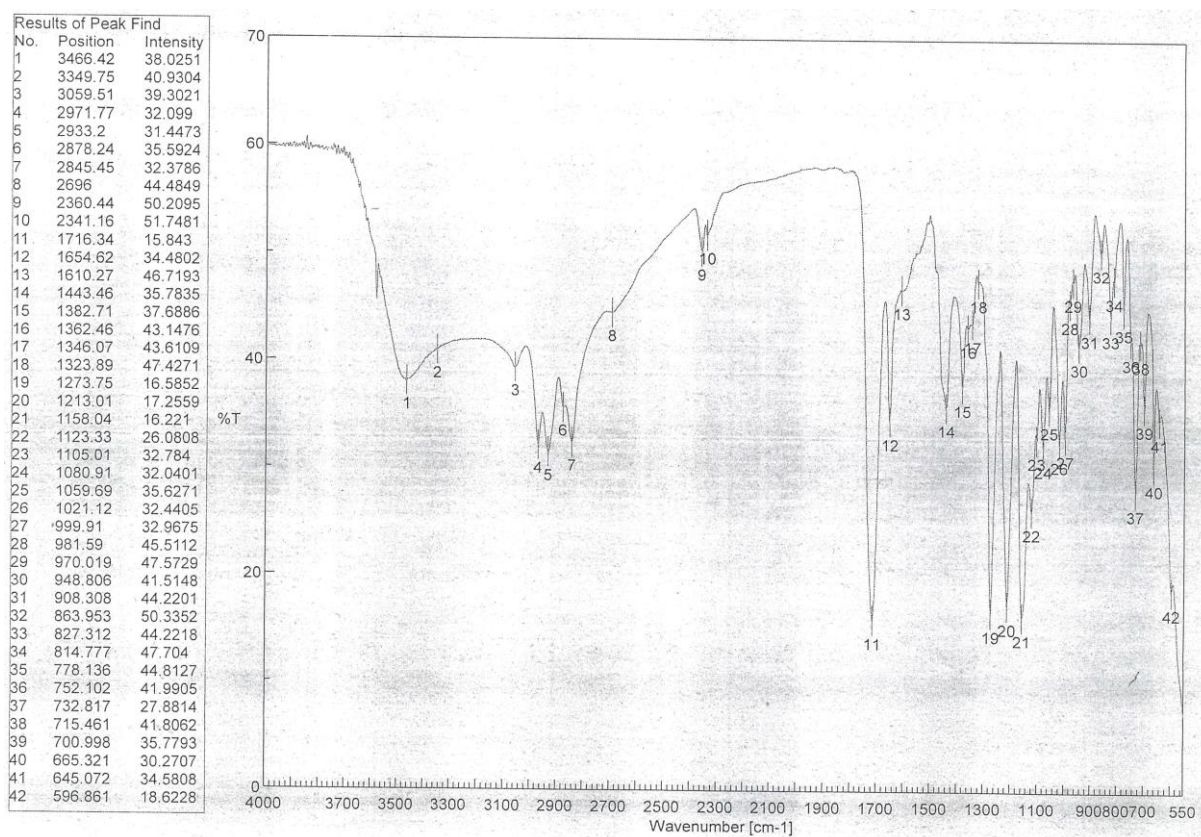

# MS of compound 1.

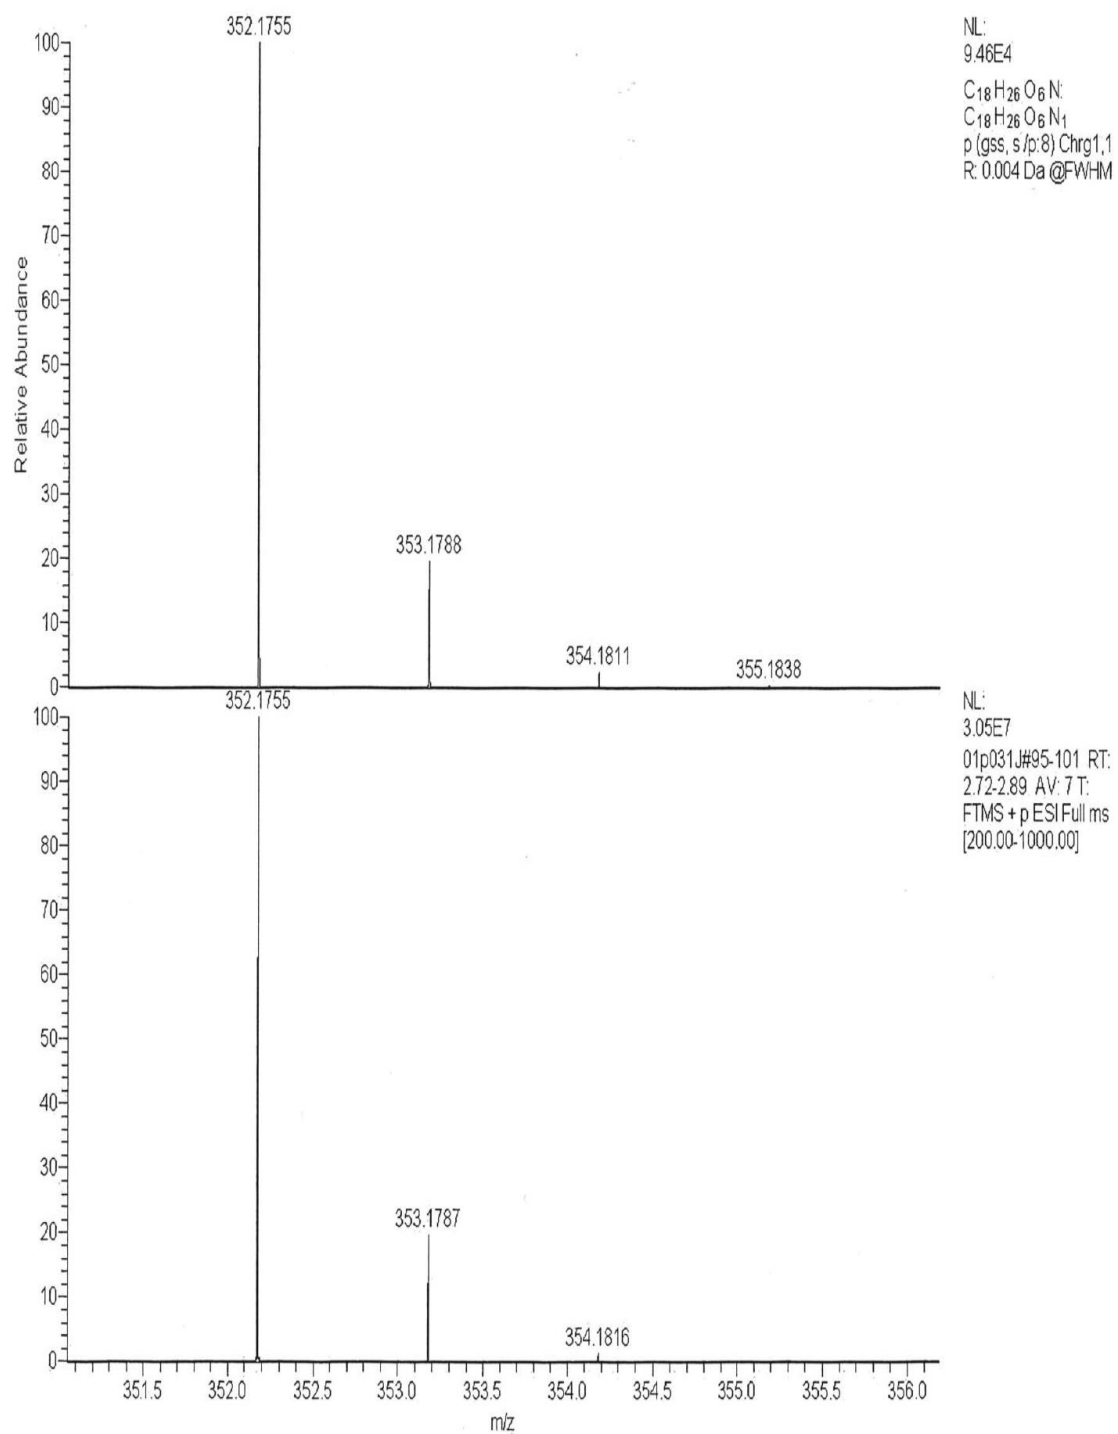

$^1\text{H}$  NMR of compound **1**.

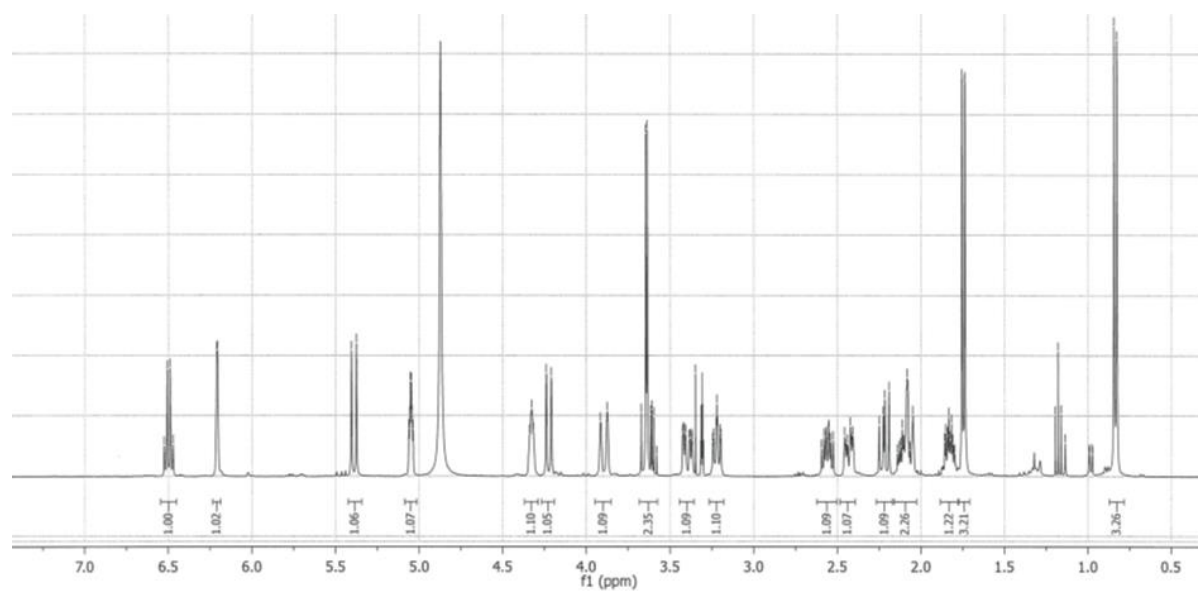

$^{13}\text{C}$  NMR of compound **1**.

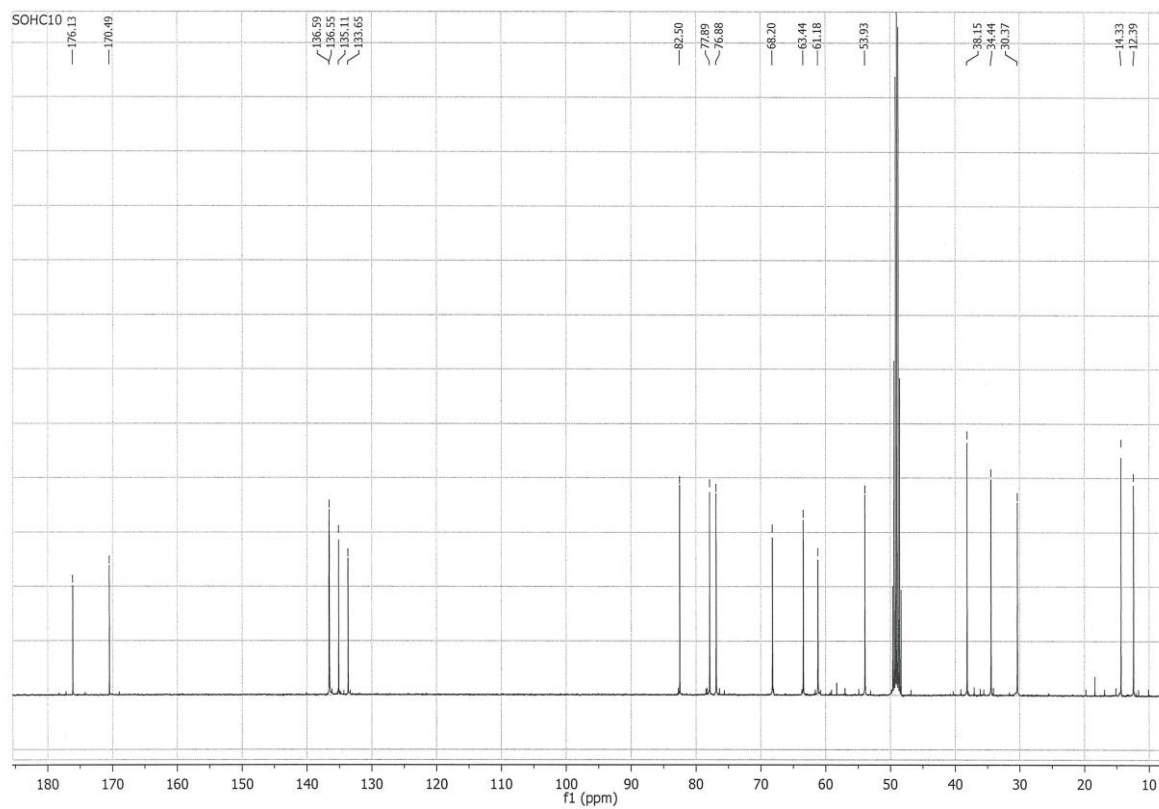

COSY of compound **1**.

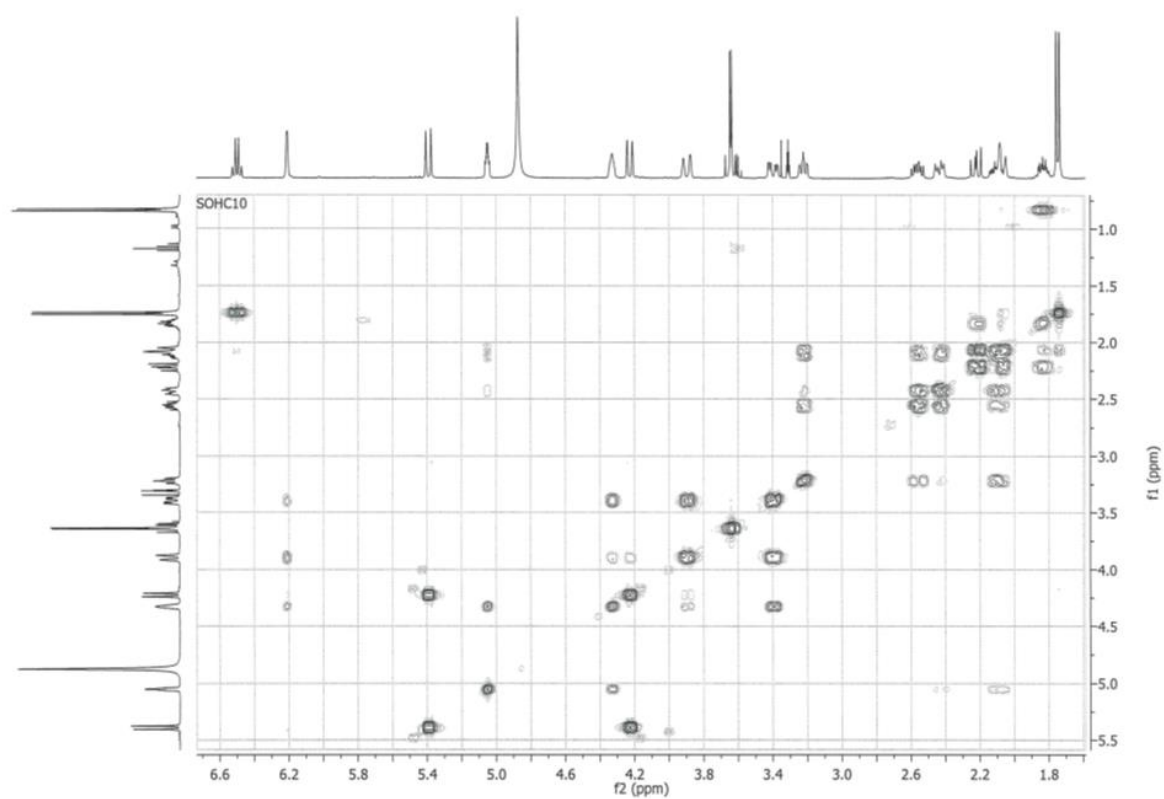

HMBC of compound **1**.

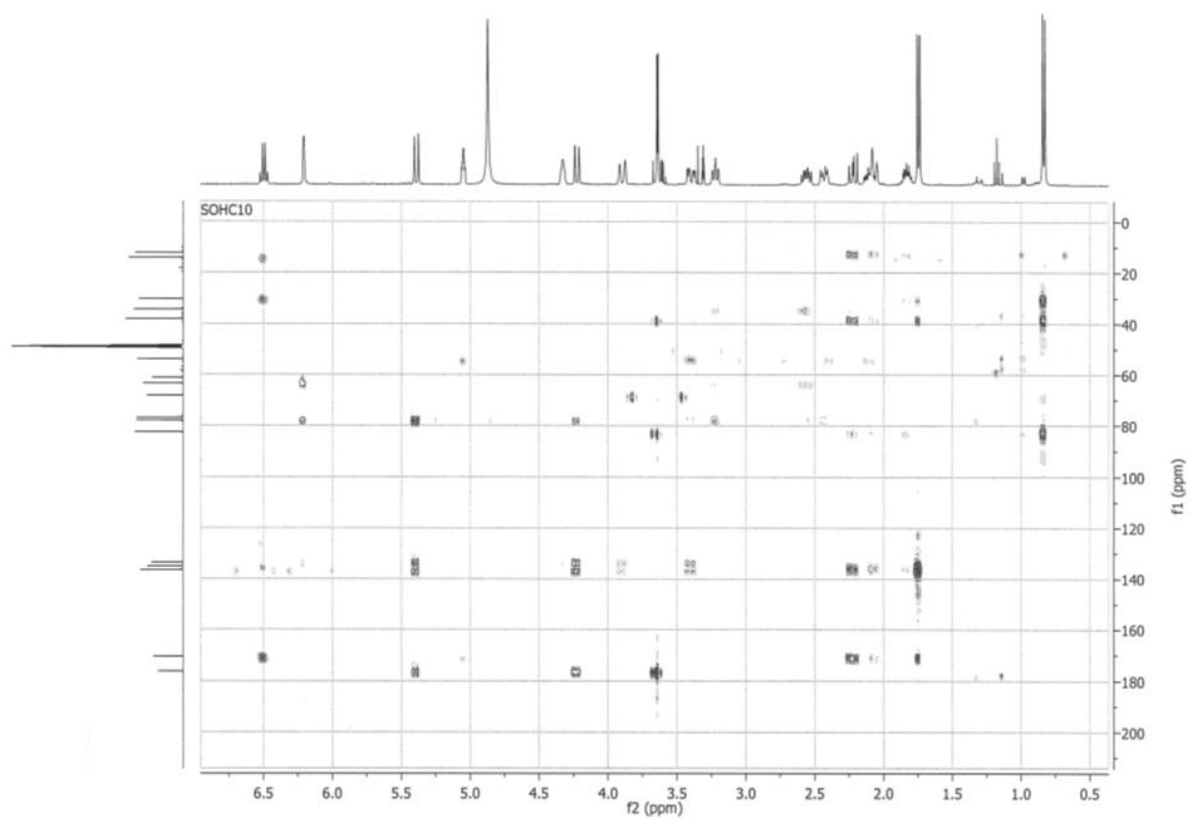

HMQC of compound **1**.

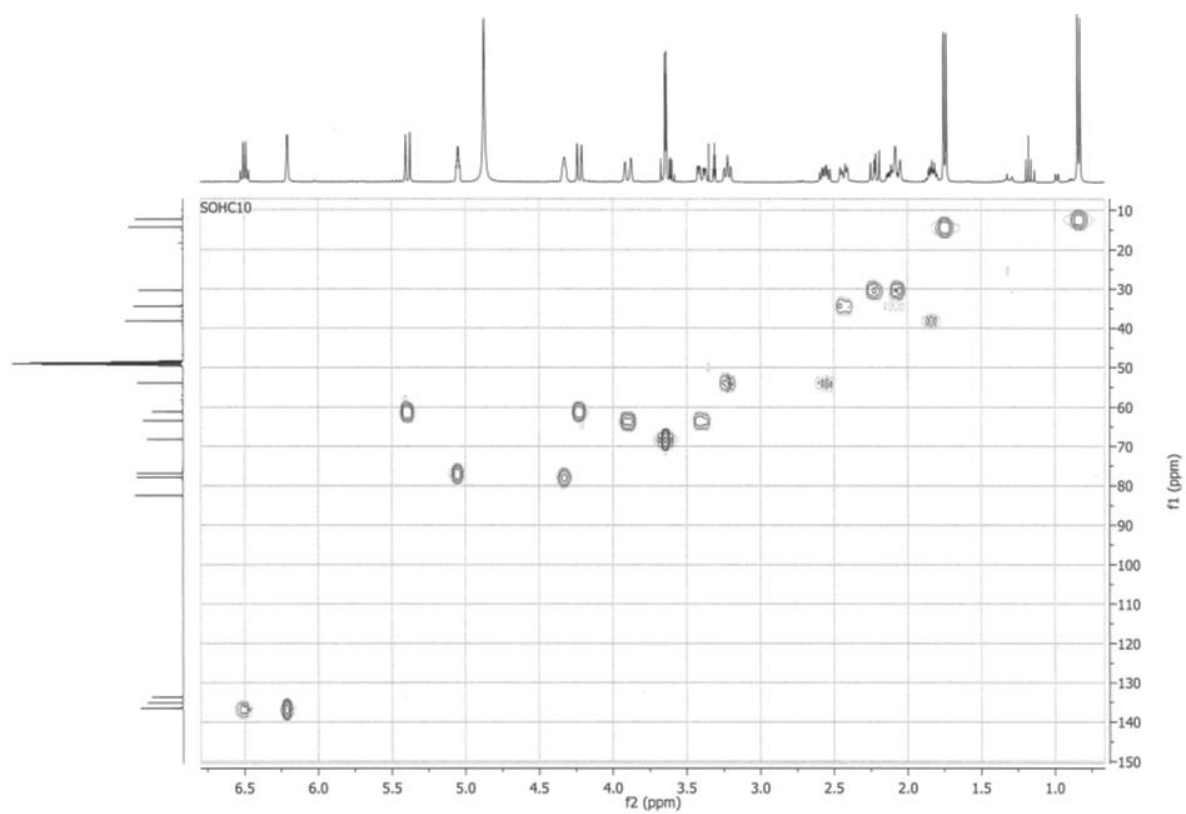

MS of compound **2**.

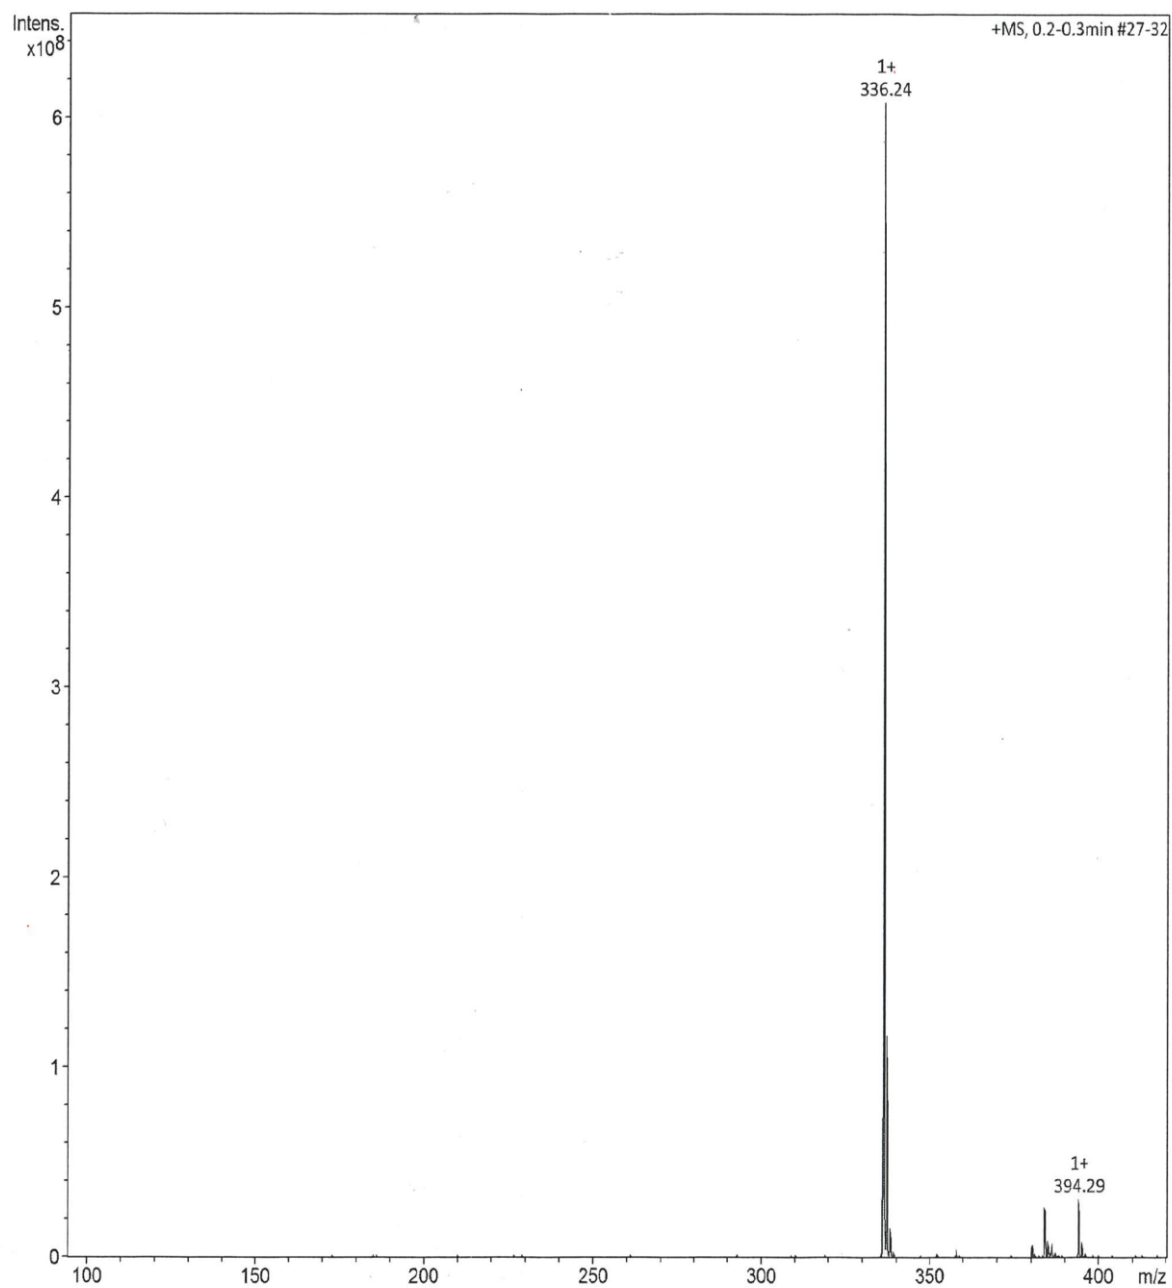



$^1\text{H}$  NMR of compound **2**.

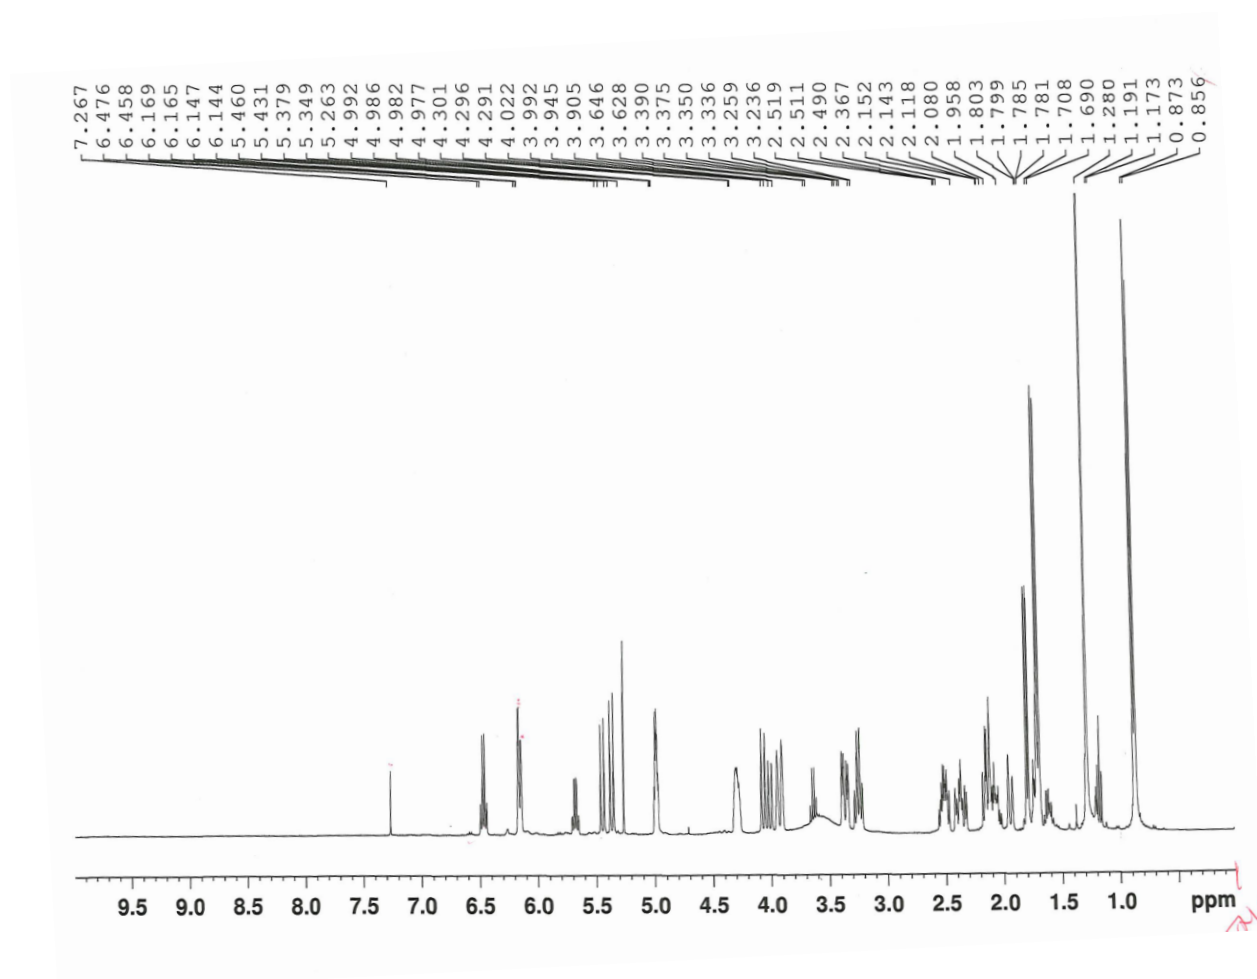

Supplement: s1 [file s1]
